# Supplementary material
Source: publisher site journal article supplement (https://www.dovepress.com/article/429104)
Supplement: Supplementary file 1 [file get_supplementary_file.php]

**Supplement Table 1. Distribution of 2499 hospital outpatients with COPD according to the GOLD 2017 and 2023 group classification**

| COPD severity/ GOLD 2017 group | Total (n = 2499) | Group A (n = 210, 8.4%) | Group B (n = 1119, 44.8%) | Group C (n = 72, 2.9%) | Group D (n = 1098, 43.9%) |
| --- | --- | --- | --- | --- | --- |
|  |  |  |  |  |  |
| Stage 1 | 266 (10.6) | 60 (28.6) | 115 (10.3) | 18 (25.0) | 73 (6.7) |
| Stage 2 | 1035 (41.4) | 117 (55.7) | 504 (45.0) | 36 (50.0) | 378 (34.4) |
| Stage 3 | 856 (34.3) | 30 (14.3) | 379 (33.9) | 14 (19.4) | 433 (39.4) |
| Stage 4 | 342 (13.7) | 3 (1.4) | 121 (10.8) | 4 (5.6) | 214 (19.5) |
| COPD severity/ GOLD 2023 group | Total (n = 2499) | Group A (n = 210, 8.4%) | Group B (n = 1119, 44.8%) | Group E (n = 1170, 46.8%) | - |
| Stage 1 | 266 (10.6) | 60 (28.6) | 115 (10.3) | 91 (7.8) |  |
| Stage 2 | 1035 (41.4) | 117 (55.7) | 504 (45.0) | 414 (35.4) |  |
| Stage 3 | 856 (34.3) | 30 (14.3) | 379 (33.9) | 447 (38.2) |  |
| Stage 4 | 342 (13.7) | 3 (1.4) | 121 (10.8) | 218 (18.6) |  |

**Abbreviations**: COPD, chronic obstructive pulmonary disease; COPD severity and group were classified using Global Initiative for Chronic Obstructive Lung Disease (GOLD) criteria.
